# Supplementary material
Source: MDPI journal article supplement (https://www.mdpi.com/2076-3417/14/7/2994)
Supplement: s1 [file s1]

# The Calculation of Maximum Electric Field Intensity in Brain Tissue Stimulated by a Current Pulse Through a Microcoil Via Capacitive Coupling

Mohammed Alzahrani and Bradley J. Roth \*

Dept, Physics, Oakland University, Rochester, Michigan, 48309, USA; alzahrani@oakland.edu

\* Correspondence: roth@oakland.edu; Tel.: (248) 375-2703

## Supplementary Material File S1

The MATLAB program used to perform the calculations is given below.

```
Nt=1000000;  
Nx=21;  
L=0.001;  
U=zeros(Nt,Nx);  
V=zeros(Nt,Nx);  
Vi=zeros(Nt,Nx);  
Ve=zeros(Nt,Nx);  
deltat=0.000000001;  
deltax=2*L/(Nx-1);  
t(1)=0;  
W=2*pi*3000;  
ri=850;  
re=3.2e8;  
k=3.8;  
eo=8.85e-12;  
d=0.3e-6;  
a=2.5e-6;  
C=k*eo/d;  
D=1/(2*pi*a*C*(ri+re));  
I=0.001;  
c1=deltax*ri*I;  
c2=deltat/deltax^2*D;  
c3=ri*I;  
for j=1:Nx  
x(j)=-L+(j-1)*deltax;  
V(1,j)=0;  
U(1,j)=0;  
end  
ncount=0;
```

```

Ebig=0;
for i=2:Nt;
t(i)=t(i-1)+deltat;
for j=2:Nx-1;
V(i,j)=V(i-1,j)+c2*(V(i-1,j+1)+V(i-1,j-1)-2*V(i-1,j));
end
V(i,1)=V(i,2)+c1*sin(W*t(i));
V(i,Nx)=V(i,Nx-1)-c1*sin(W*t(i));
for j=1:Nx
U(i,j)=-c3*sin(W*t(i))*x(j);
end
for j=1:Nx
Ve(i,j)=(re/(ri+re))*(U(i,j)-V(i,j));
Vi(i,j)=(re/(ri+re))*(U(i,j)+(ri/re)*V(i,j));
end
for j=2:Nx-1
E(i,j)=-(Ve(i,j+1)-Ve(i,j-1))/(2*deltax);
end
if(E(i,(Nx+1)/2)>Ebig)
Ebig=E(i,(Nx+1)/2);
end
ncount=ncount+1;
if(ncount>99999)
i
ncount=0;
end
end
Ebig

```
